# Supplementary material
Source: MDPI journal article supplement (https://www.mdpi.com/2304-6740/10/11/205)
Supplement: s1 [file s1]

# Supporting information

## Synthesis of novel ferrocene-benzofuran hybrids via palladium and copper catalyzed reactions

Enikő Nagy,<sup>1</sup> Márk Váradi,<sup>1</sup> Zoltán Nagymihály,<sup>2</sup> László Kollár,<sup>2,3</sup> Krisztina Kovács,<sup>4</sup> Kitti Andreidesz,<sup>4</sup> Ágnes Gömöry,<sup>5</sup> Nikolay Tumanov,<sup>6</sup> Johan Wouters,<sup>6</sup> and Rita Skoda-Földes<sup>1,\*</sup>

<sup>1</sup> Research Group of Organic Synthesis and Catalysis, Center of Natural Sciences, University of Pannonia, Egyetem u. 10. H-8200 Veszprém, P.O. Box 158, Hungary

<sup>2</sup> Department of Inorganic Chemistry and ELKH-PTE Research Group for Selective Chemical Syntheses, University of Pécs, Ifjúság u. 6, H-7624 Pécs, Hungary

<sup>3</sup> Szentágotthai Research Centre, H-7624 Pécs, Hungary

<sup>4</sup> Department of Biochemistry and Medical Chemistry University of Pécs, Medical School, Szigeti út 12, H-7624, Pécs, Hungary

<sup>5</sup> Research Centre for Natural Science, Eötvös Loránd Research Network, Magyar tudósok körútja 2. H-1117 Budapest, Hungary

<sup>6</sup> Department of Chemistry, Namur Institute of Structured Matter (NISM), University of Namur, Rue de Bruxelles 61, B-5000, Namur, Belgium

\* Correspondence: [skodane.foldes.rita@mk.uni-pannon.hu](mailto:skodane.foldes.rita@mk.uni-pannon.hu)

# NMR spectra of products

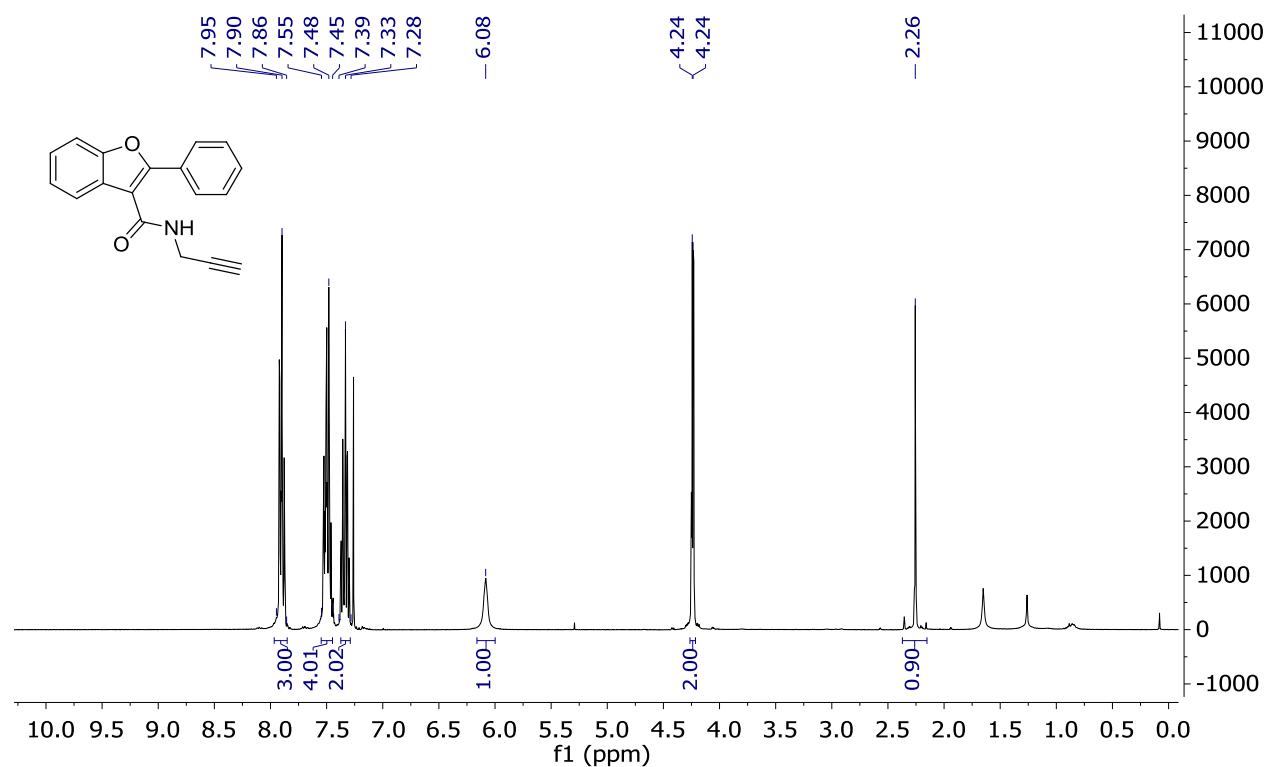

Figure S1. <sup>1</sup>H-NMR spectrum of compound **2** (400.13 MHz, CDCl<sub>3</sub>)

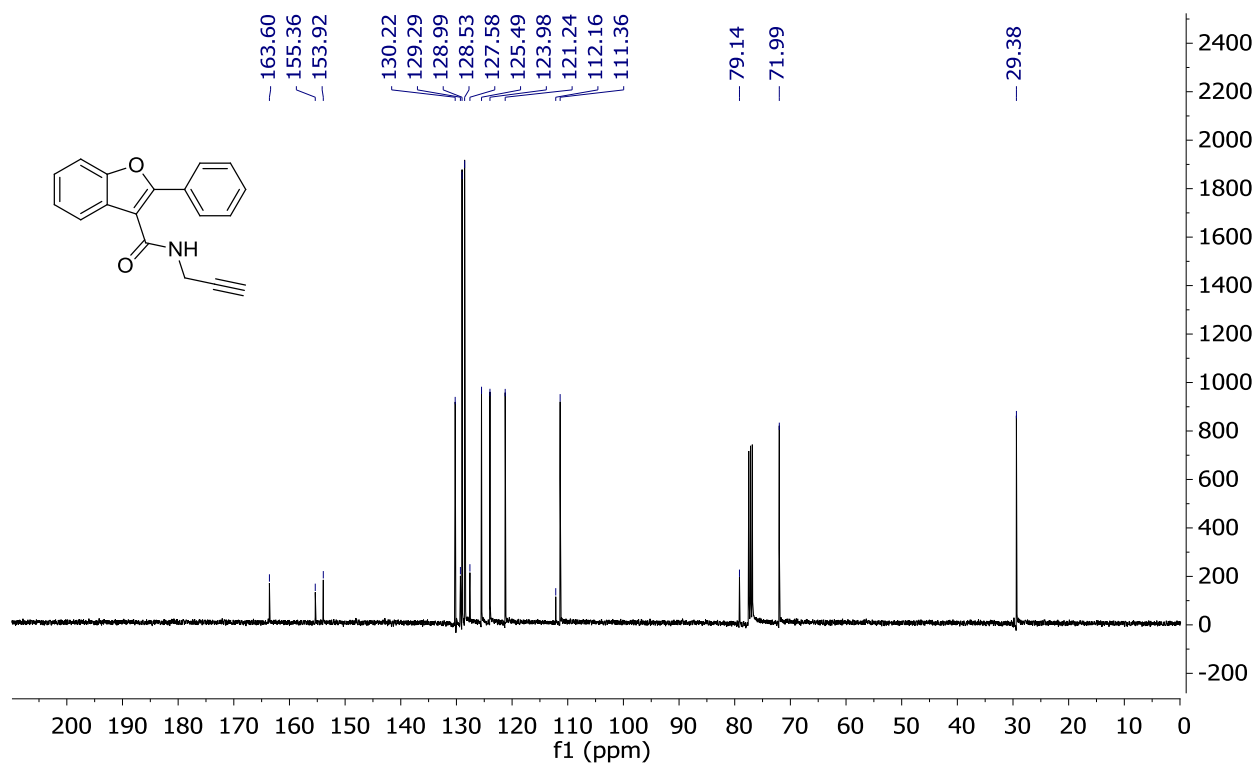

Figure S2. <sup>13</sup>C{<sup>1</sup>H}-NMR spectrum of compound **2** (100.62 MHz, CDCl<sub>3</sub>)

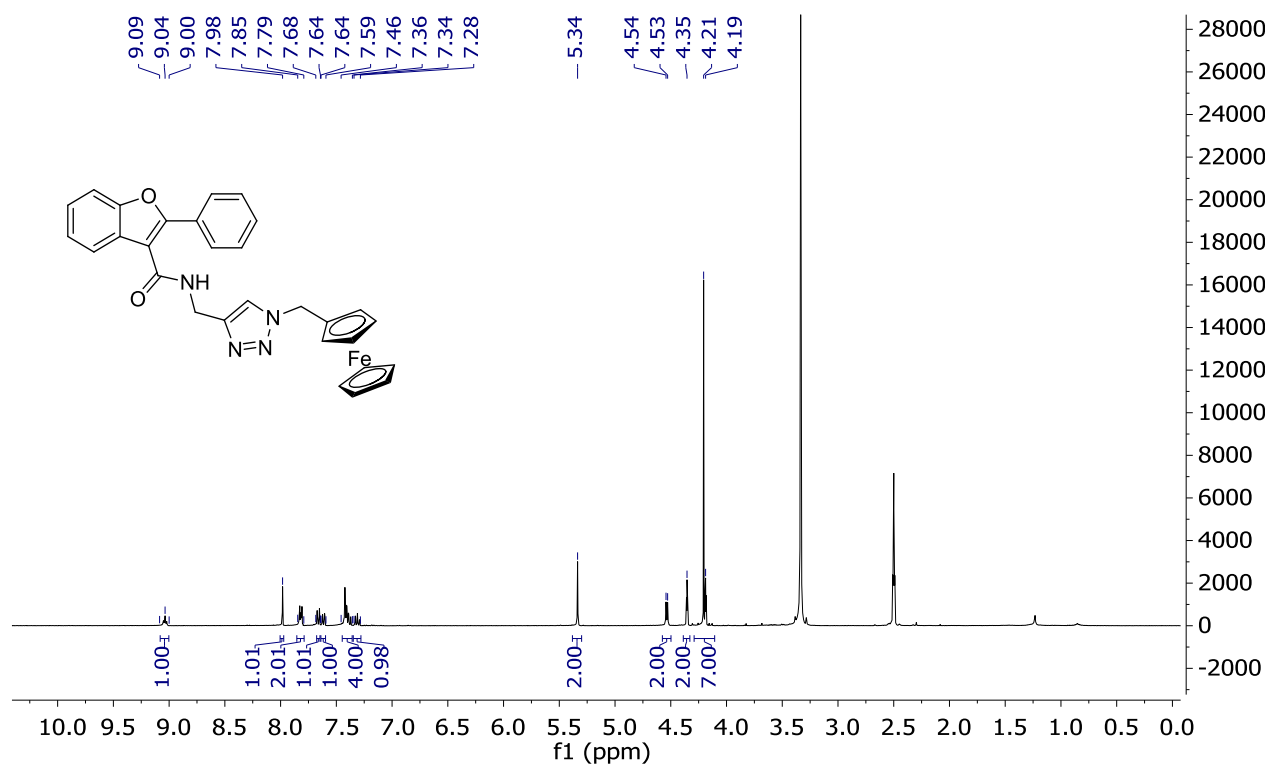

Figure S3. <sup>1</sup>H-NMR spectrum of compound **3** (400.13 MHz, DMSO-d<sub>6</sub>)

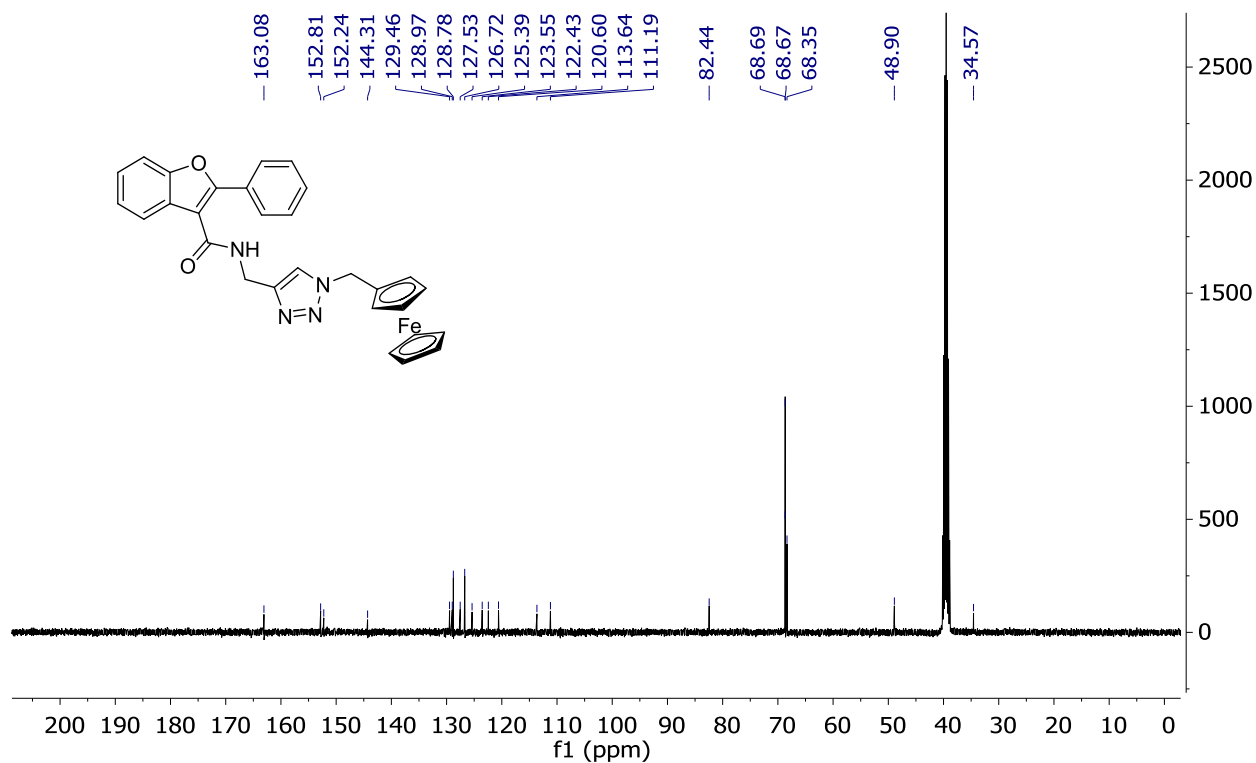

Figure S4. <sup>13</sup>C{<sup>1</sup>H}-NMR spectrum of compound **3** (100.62 MHz, DMSO-d<sub>6</sub>)

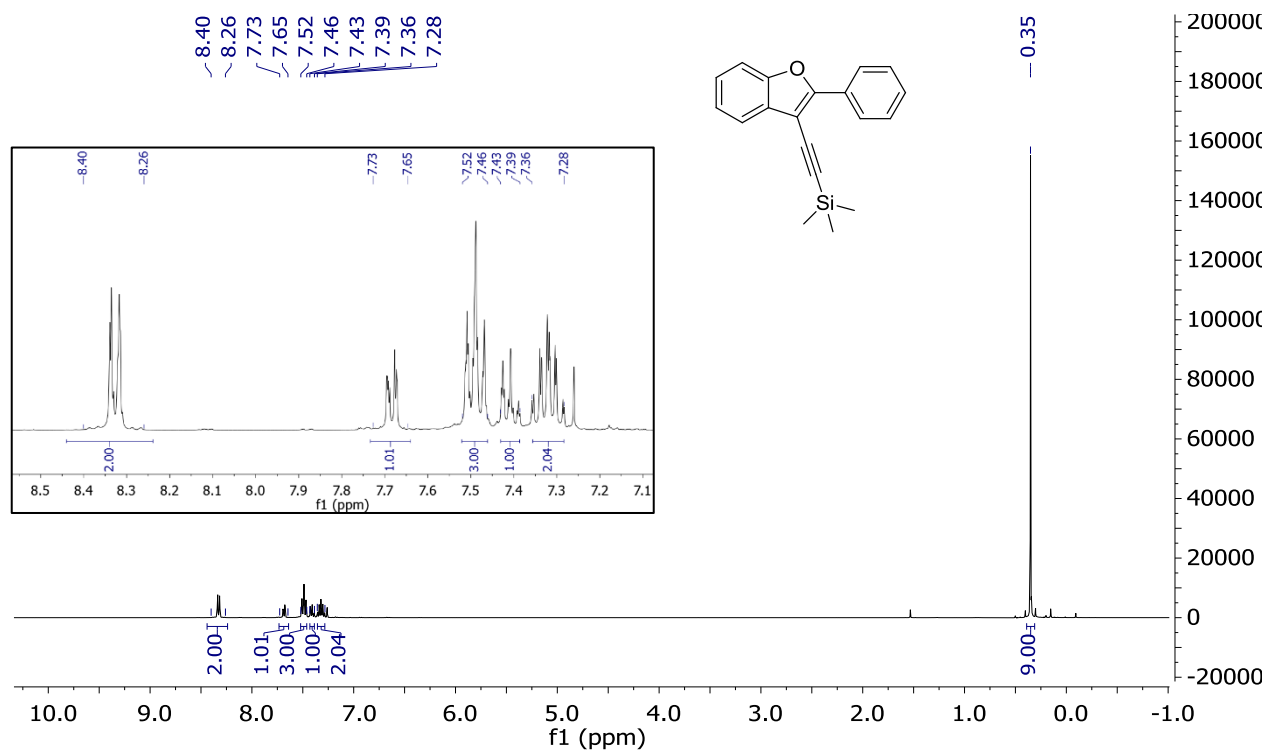

Figure S5. <sup>1</sup>H-NMR spectrum of compound **4** (400.13 MHz, CDCl<sub>3</sub>)

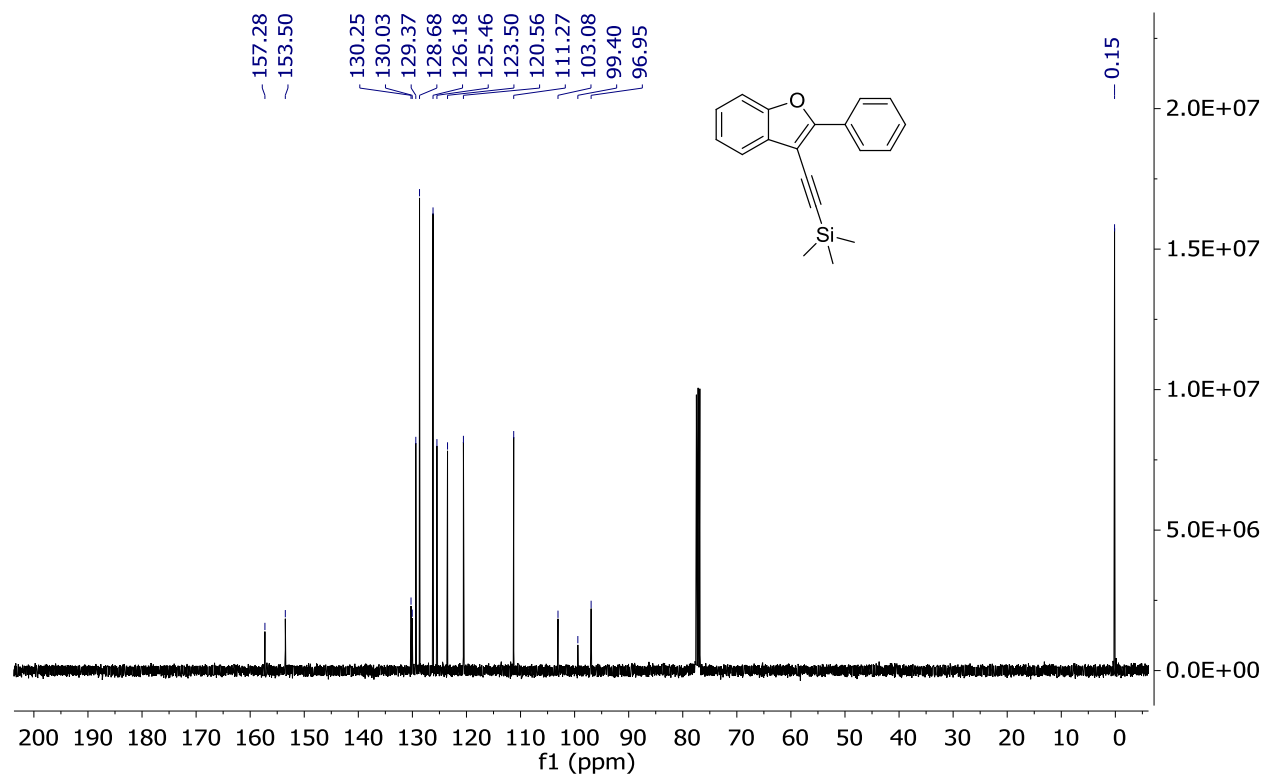

Figure S6. <sup>13</sup>C{<sup>1</sup>H}-NMR spectrum of compound **4** (100.62 MHz, CDCl<sub>3</sub>)

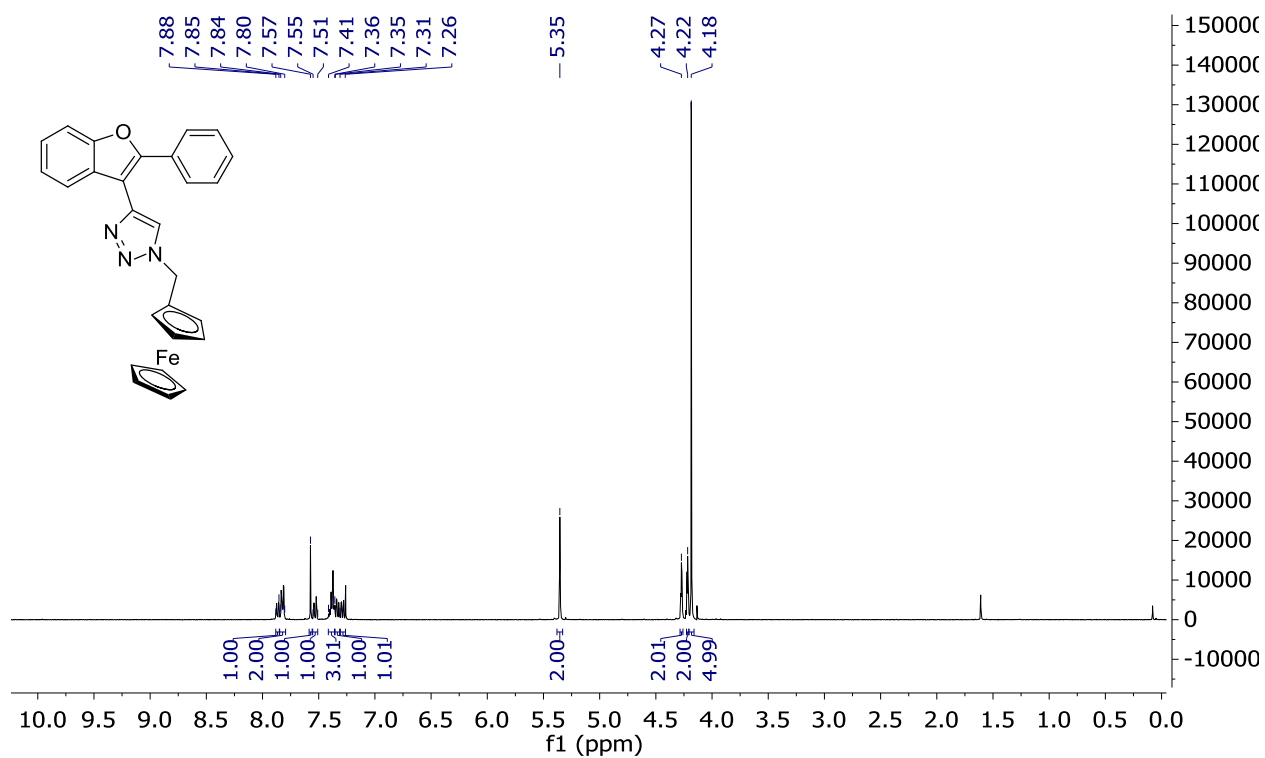

Figure S7. <sup>1</sup>H-NMR spectrum of compound **6a** (400.13 MHz, CDCl<sub>3</sub>)

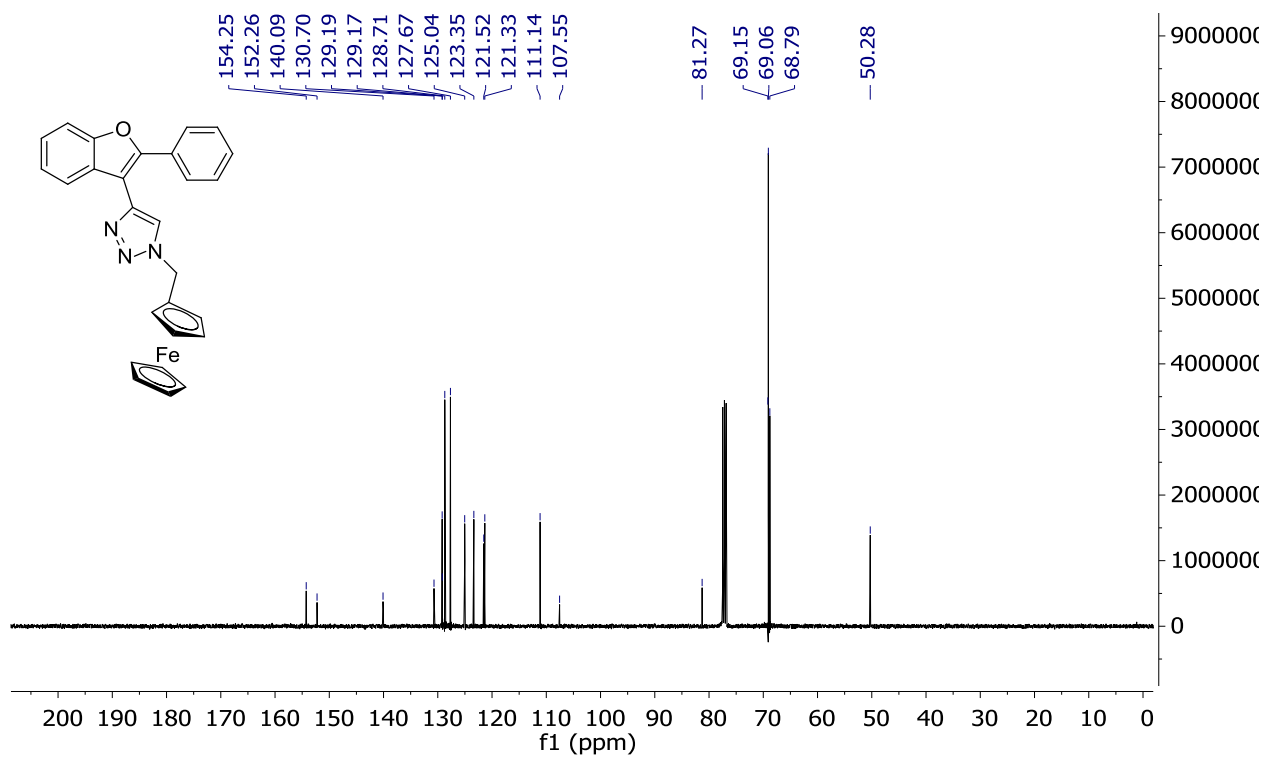

Figure S8. <sup>13</sup>C{<sup>1</sup>H}-NMR spectrum of compound **6a** (100.62 MHz, CDCl<sub>3</sub>)

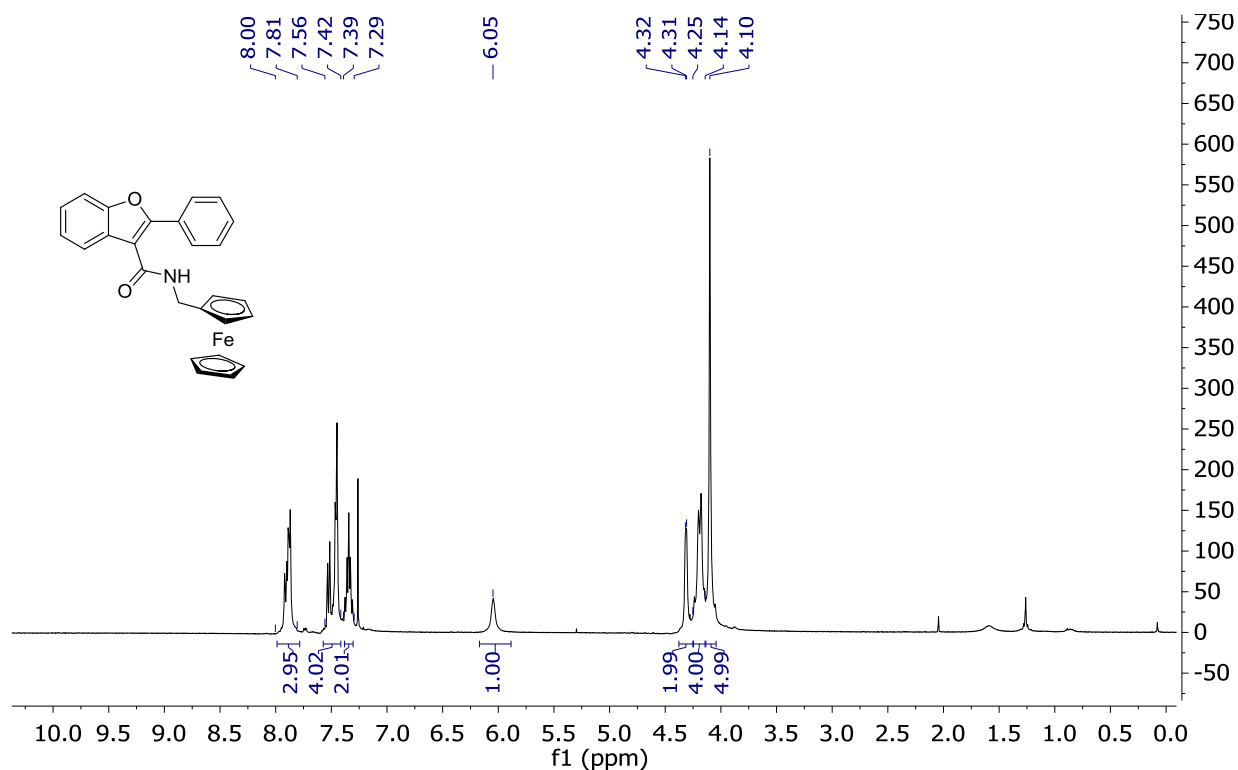

Figure S9. <sup>1</sup>H-NMR spectrum of compound **7** (400.13 MHz, CDCl<sub>3</sub>)

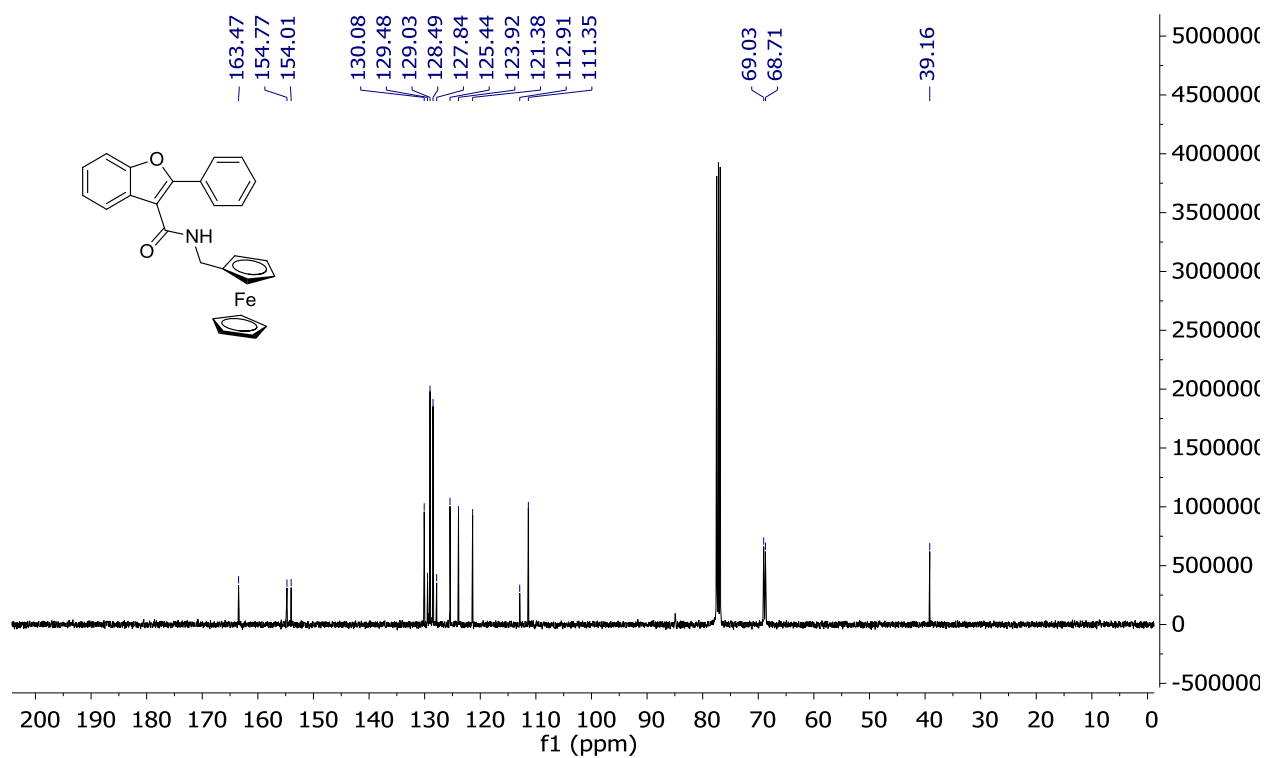

Figure S10. <sup>13</sup>C{<sup>1</sup>H}-NMR spectrum of compound **7** (100.62 MHz, CDCl<sub>3</sub>)

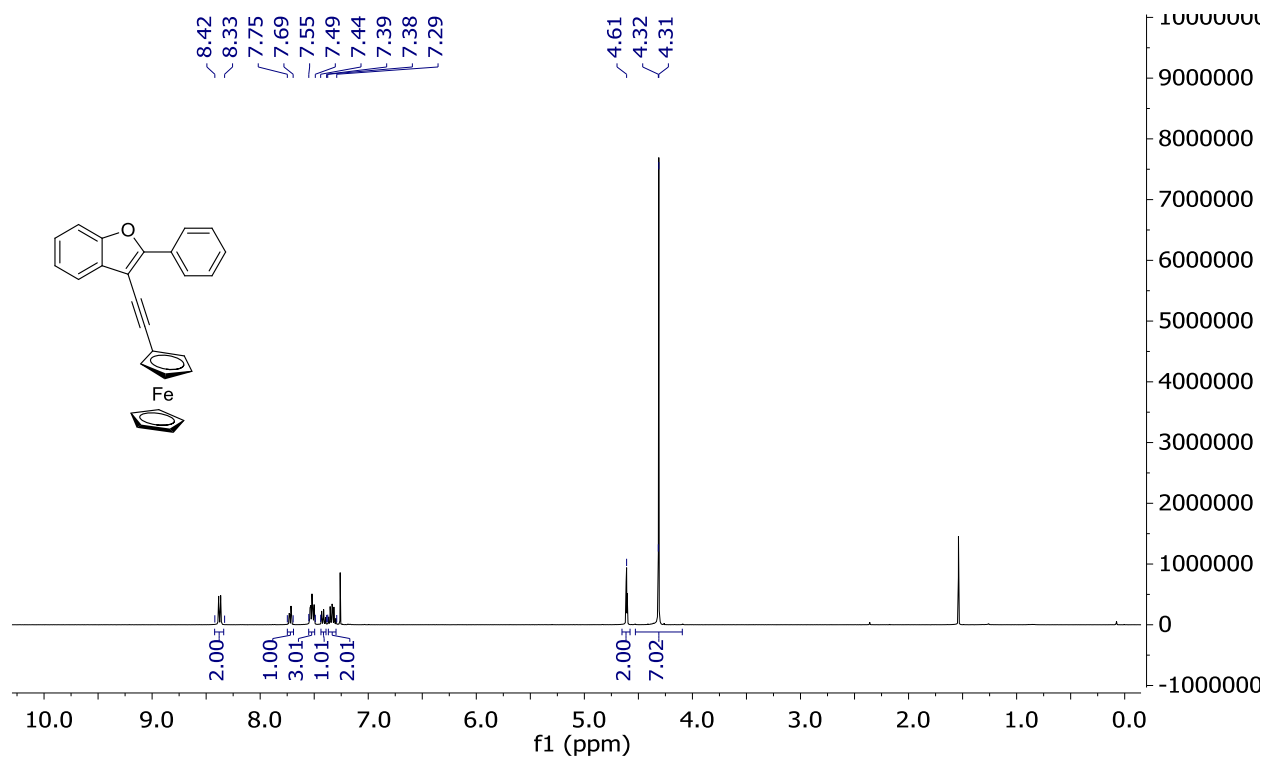

Figure S11. <sup>1</sup>H-NMR spectrum of compound **9** (400.13 MHz, CDCl<sub>3</sub>)

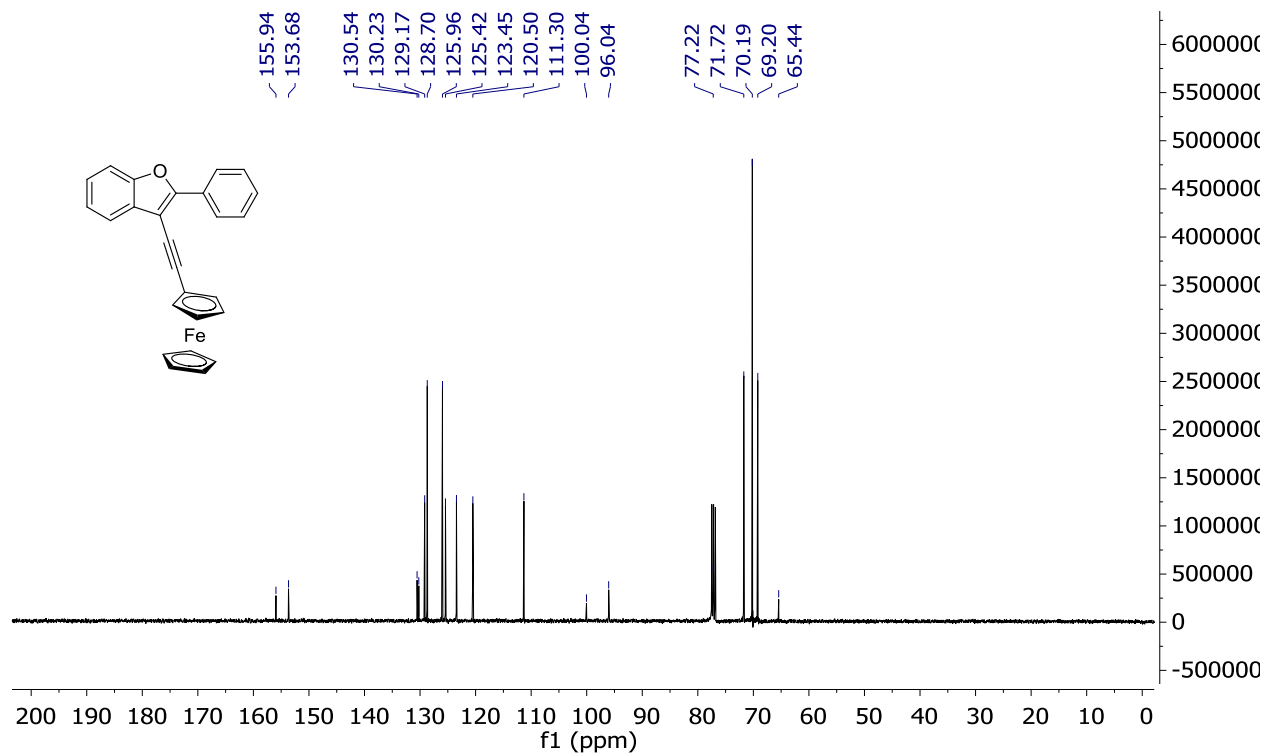

Figure S12. <sup>13</sup>C{<sup>1</sup>H}-NMR spectrum of compound **9** (100.62 MHz, CDCl<sub>3</sub>)

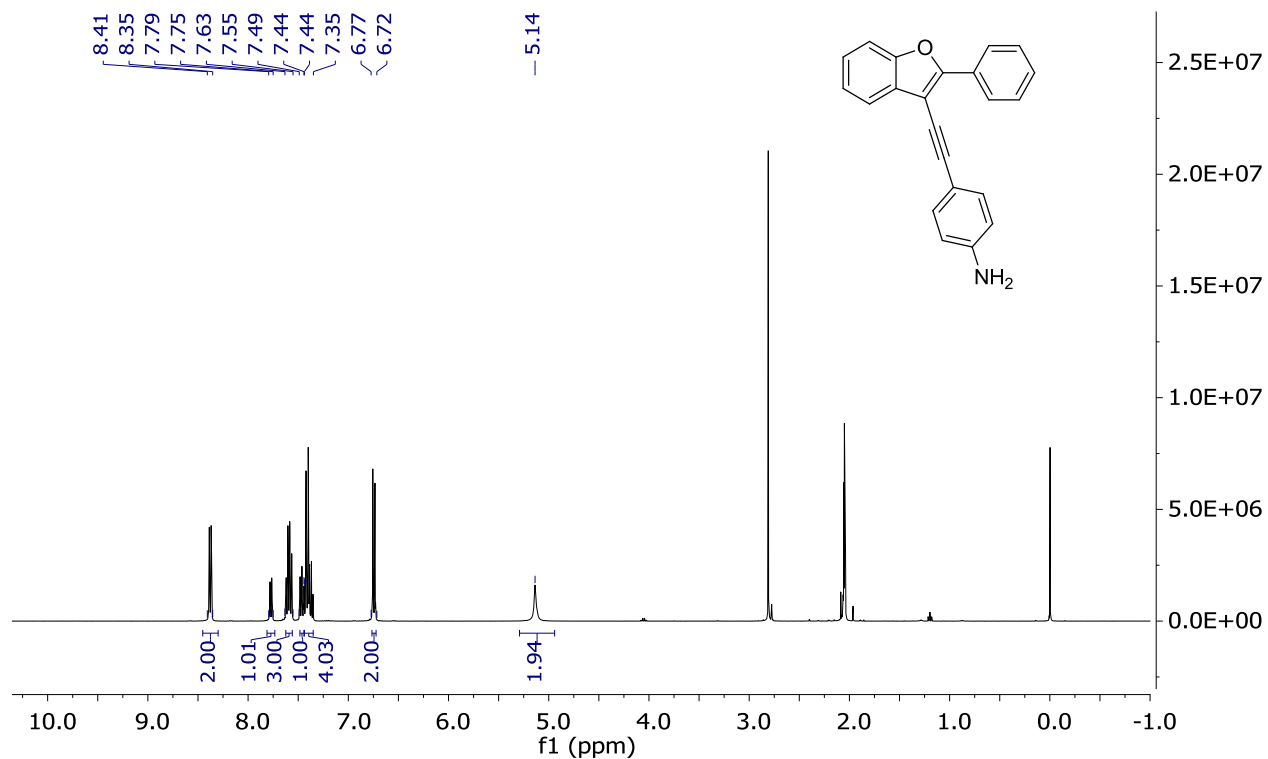

Figure S13.  $^1\text{H}$ -NMR spectrum of compound **10** (400.13 MHz, Acetone- $\text{d}_6$ )

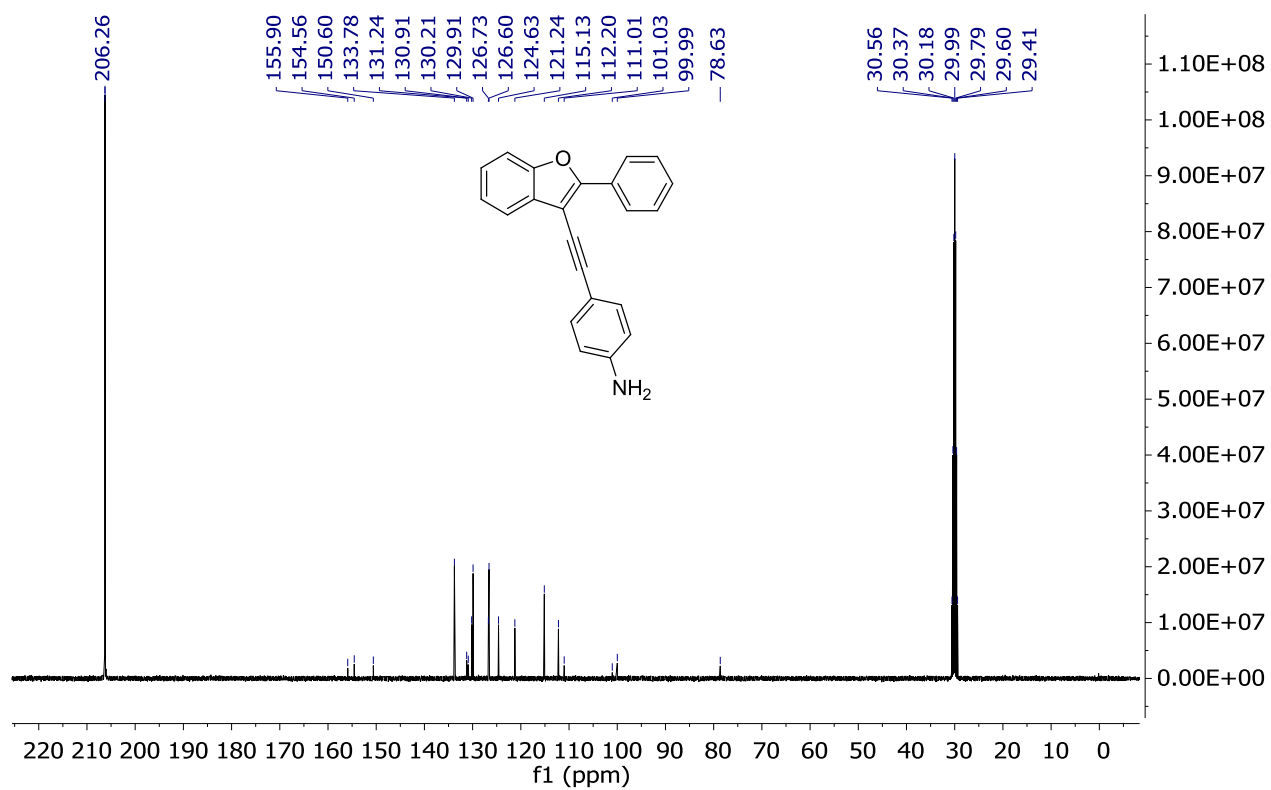

Figure S14.  $^{13}\text{C}\{^1\text{H}\}$ -NMR spectrum of compound **10** (100.62 MHz, Acetone- $\text{d}_6$ )



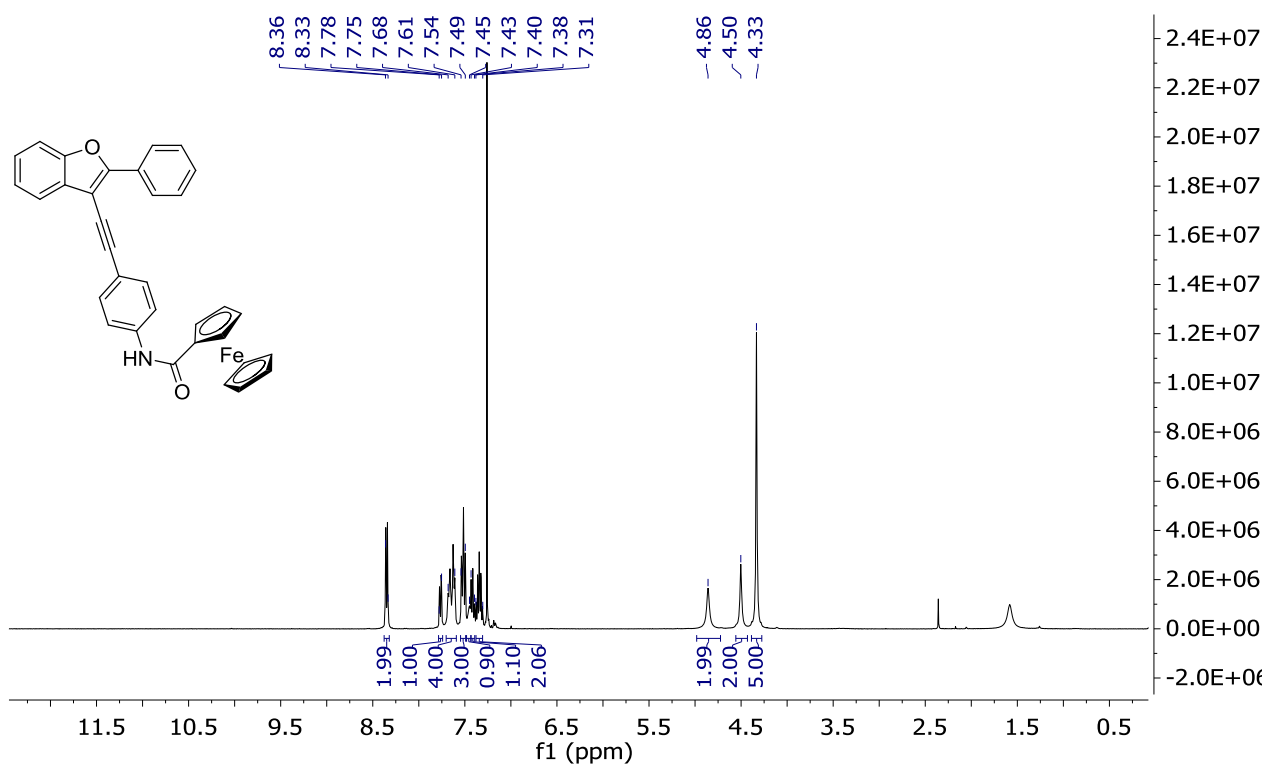

Figure S15. <sup>1</sup>H-NMR spectrum of compound **11** (400.13 MHz, CDCl<sub>3</sub>)

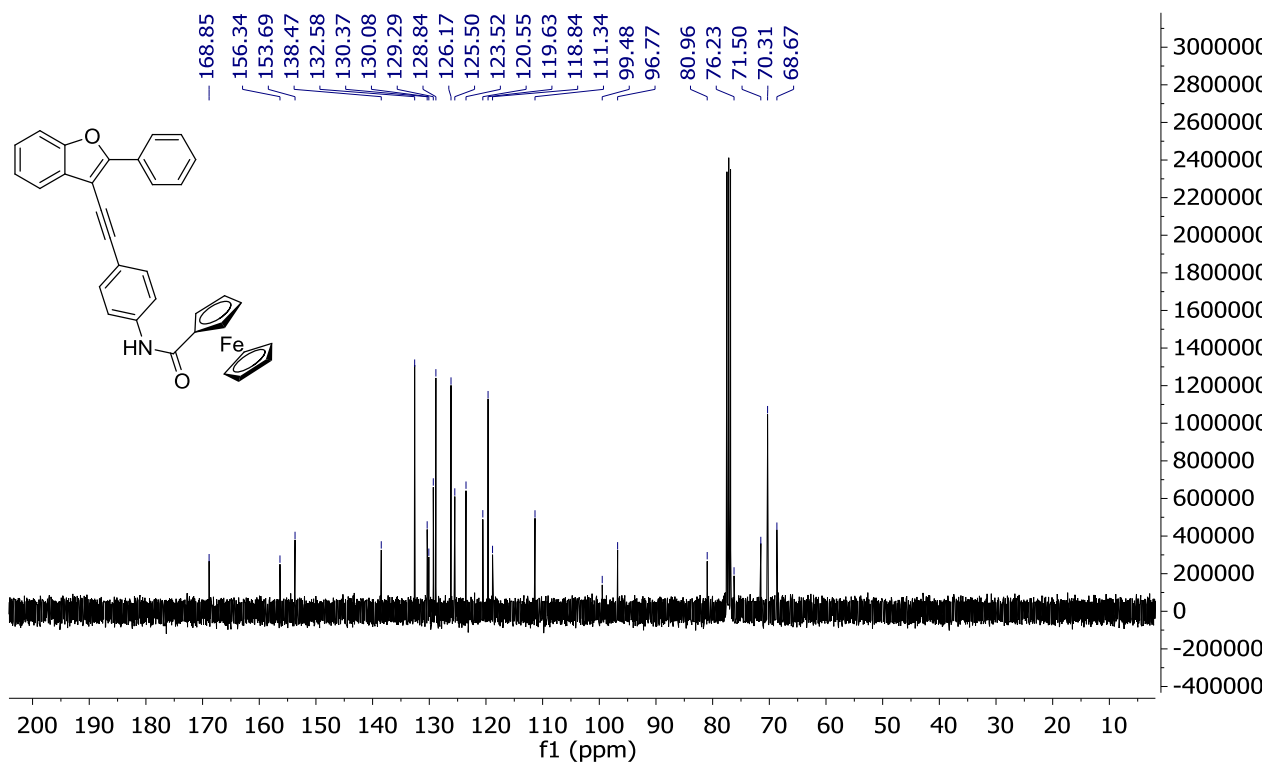

Figure S16. <sup>13</sup>C{<sup>1</sup>H}-NMR spectrum of compound **11** (100.62 MHz, CDCl<sub>3</sub>)

### SWV measurements of ferrocene-benzofuran hybrids

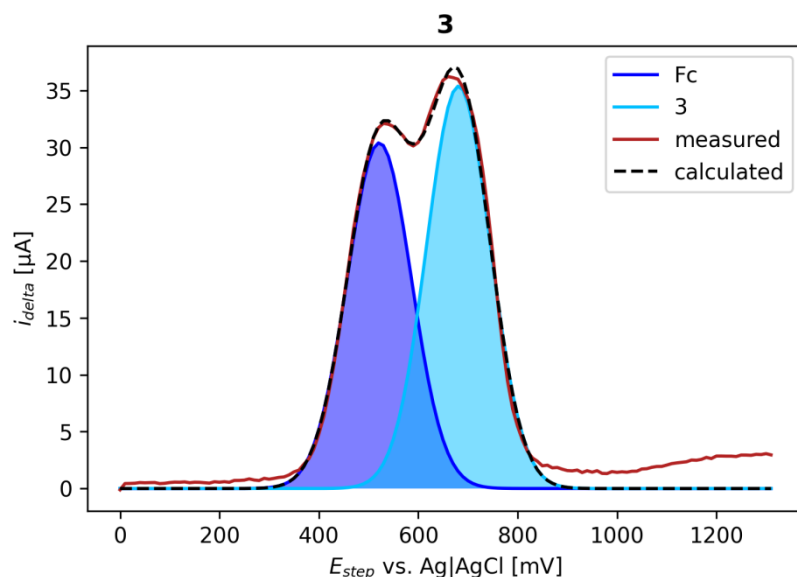

Figure S17. Measured and calculated SWV curves of ferrocene-benzofuran hybrid **3** (setup:  $2.5 \times 10^{-3}$  M in  $\text{CH}_2\text{Cl}_2$ , supporting electrolyte: 0.1 M  $n\text{-Bu}_4\text{NPF}_6$ , in the presence of ferrocene (Fc) ( $1.25 \times 10^{-3}$  M), working electrode: glassy carbon, reference electrode: Ag/AgCl ( $\text{H}_2\text{O}$ ), auxiliary electrode: Pt wire) and calculated curves for individual components.

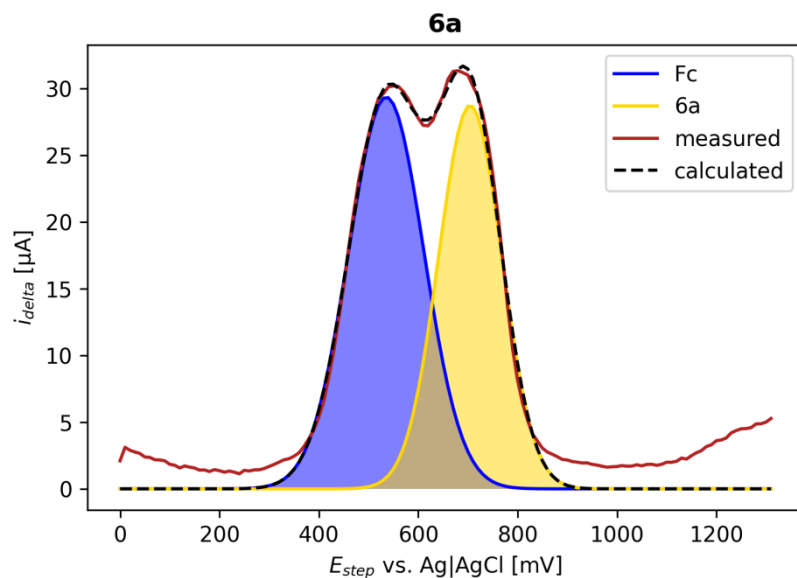

Figure S18. Measured and calculated SWV curves of ferrocene-benzofuran hybrid **6a** (setup:  $2.5 \times 10^{-3}$  M in  $\text{CH}_2\text{Cl}_2$ , supporting electrolyte: 0.1 M  $n\text{-Bu}_4\text{NPF}_6$ , in the presence of ferrocene (Fc) ( $1.25 \times 10^{-3}$  M), working electrode: glassy carbon, reference electrode: Ag/AgCl ( $\text{H}_2\text{O}$ ), auxiliary electrode: Pt wire) and calculated curves for individual components.

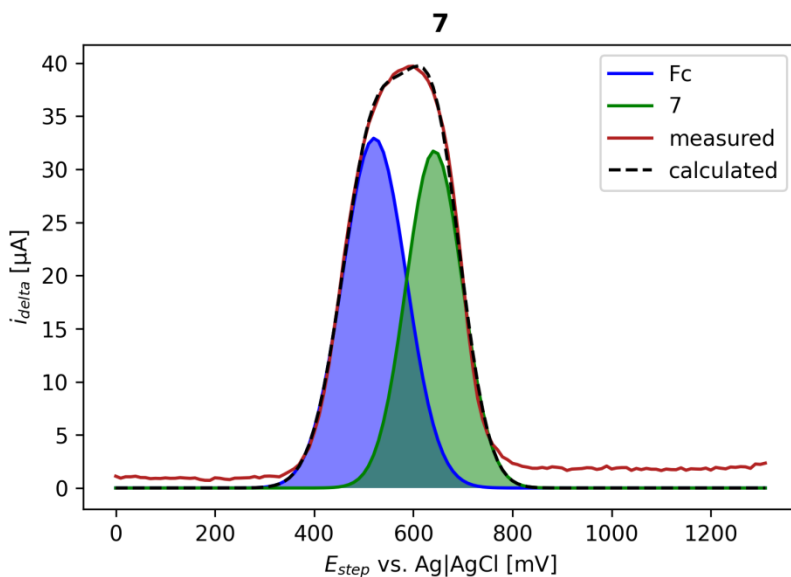

Figure S19. Measured and calculated SWV curves of ferrocene-benzofuran hybrid **7** (setup:  $2.5 \times 10^{-3}$  M in  $\text{CH}_2\text{Cl}_2$ , supporting electrolyte: 0.1 M  $n\text{-Bu}_4\text{NPF}_6$ , in the presence of ferrocene (Fc) ( $1.25 \times 10^{-3}$  M), working electrode: glassy carbon, reference electrode: Ag/AgCl ( $\text{H}_2\text{O}$ ), auxiliary electrode: Pt wire) and calculated curves for individual components.

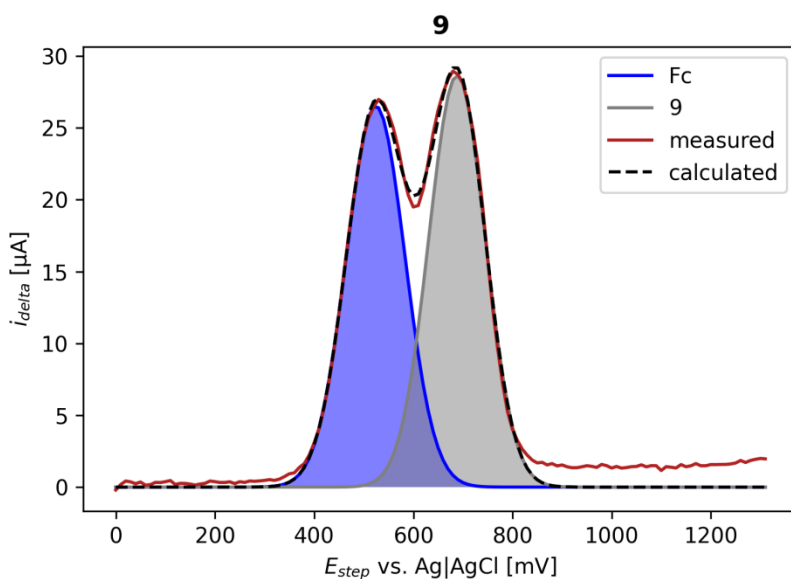

Figure S20. Measured and calculated SWV curves of ferrocene-benzofuran hybrid **9** (setup:  $2.5 \times 10^{-3}$  M in  $\text{CH}_2\text{Cl}_2$ , supporting electrolyte: 0.1 M  $n\text{-Bu}_4\text{NPF}_6$ , in the presence of ferrocene (Fc) ( $1.25 \times 10^{-3}$  M), working electrode: glassy carbon, reference electrode: Ag/AgCl ( $\text{H}_2\text{O}$ ), auxiliary electrode: Pt wire) and calculated curves for individual components.

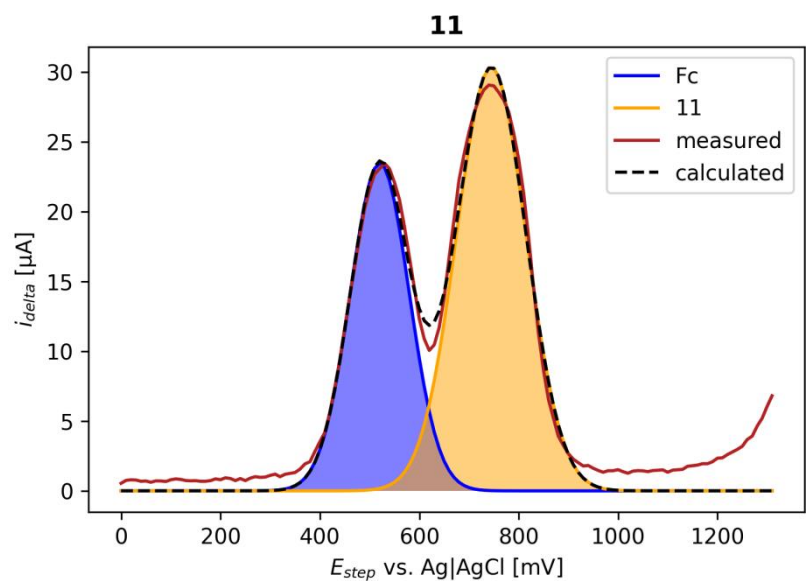

Figure S21. Measured and calculated SWV curves of ferrocene-benzofuran hybrid **11** (setup:  $2.5 \times 10^{-3}$  M in  $\text{CH}_2\text{Cl}_2$ , supporting electrolyte: 0.1 M  $n\text{-Bu}_4\text{NPF}_6$ , in the presence of ferrocene (Fc) ( $1.25 \times 10^{-3}$  M), working electrode: glassy carbon, reference electrode: Ag/AgCl ( $\text{H}_2\text{O}$ ), auxiliary electrode: Pt wire) and calculated curves for individual components.

## Cytotoxicity measurements

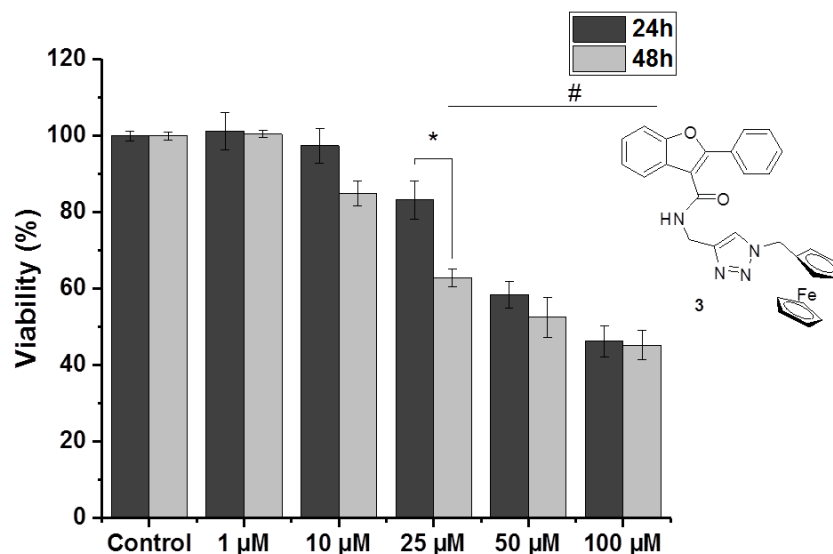

Figure S22. The effects of compound **3** on the viability of MCF7 cells, evaluated by MTT assay. Cells were treated with 1  $\mu$ M, 10  $\mu$ M, 25  $\mu$ M, 50  $\mu$ M and 100  $\mu$ M for 24 h or 48h. Data are shown as mean  $\pm$  SEM of at least three separate experiments. \*  $p < 0.05$  compared with the untreated cells. # :  $p < 0.05$  compared with the cells treated with the 10  $\mu$ M solution

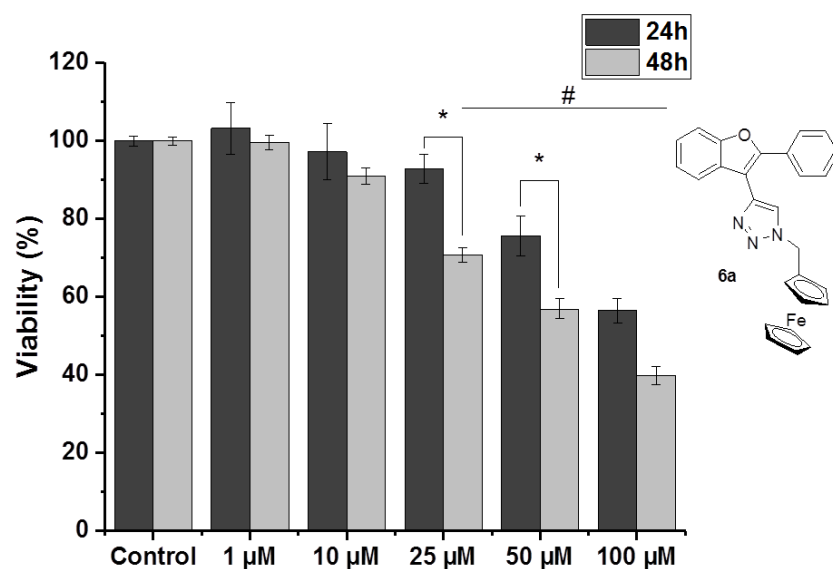

Figure S23. The effects of compound **6a** on the viability of MCF7 cells, evaluated by MTT assay. Cells were treated with 1  $\mu$ M, 10  $\mu$ M, 25  $\mu$ M, 50  $\mu$ M and 100  $\mu$ M for 24 h or 48h. Data are shown as mean  $\pm$  SEM of at least three separate experiments. \*  $p < 0.05$  compared with the untreated cells. # :  $p < 0.05$  compared with the cells treated with the 10  $\mu$ M solution

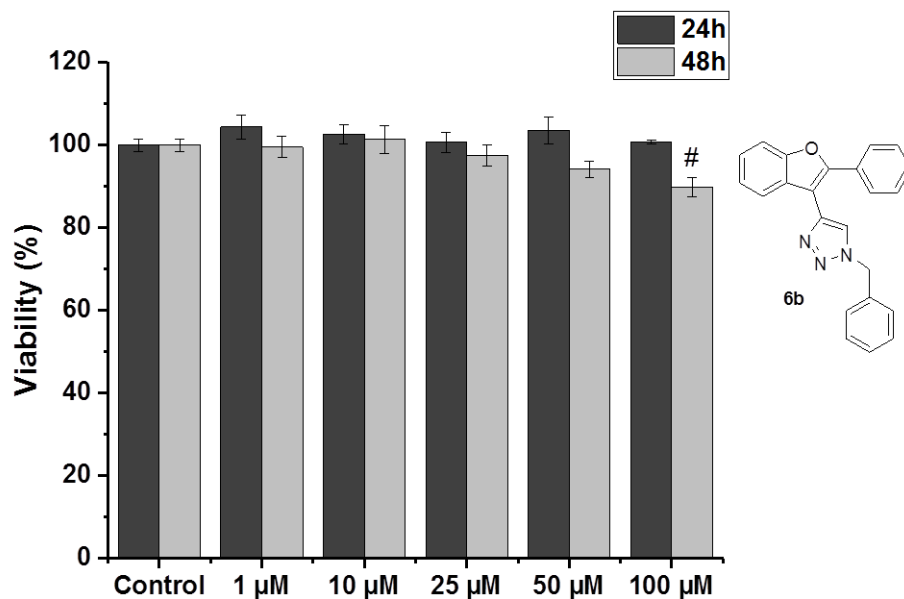

Figure S24. The effects of compound **6b** on the viability of MCF7 cells, evaluated by MTT assay. Cells were treated with 1 μM, 10 μM, 25 μM, 50 μM and 100 μM for 24 h or 48h. Data are shown as mean  $\pm$  SEM of at least three separate experiments. # : p < 0.05 compared with the cells treated with the 10 μM solution

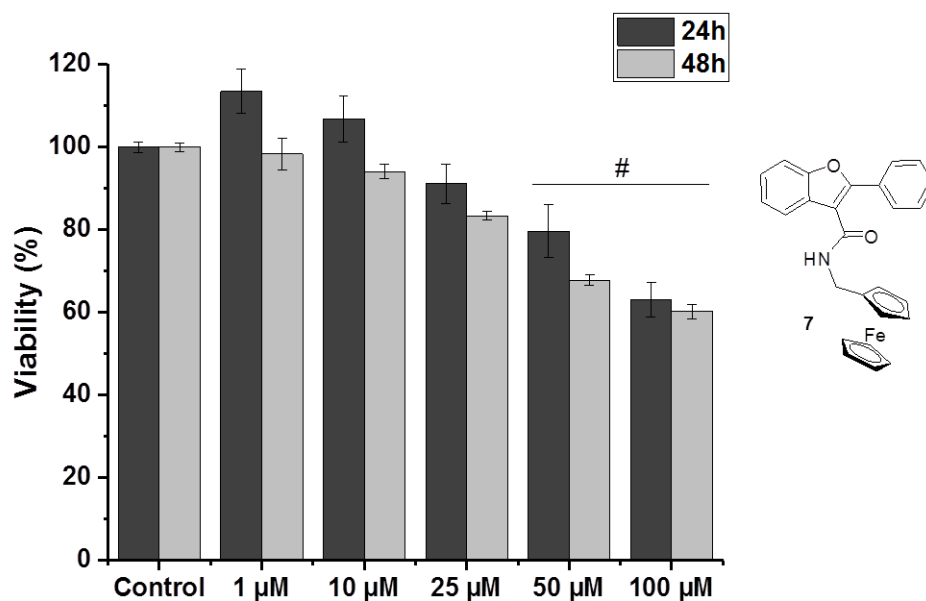

Figure S25. The effects of compound **7** on the viability of MCF7 cells, evaluated by MTT assay. Cells were treated with 1 μM, 10 μM, 25 μM, 50 μM and 100 μM for 24 h or 48h. Data are shown as mean  $\pm$  SEM of at least three separate experiments. # : p < 0.05 compared with the cells treated with the 10 μM solution

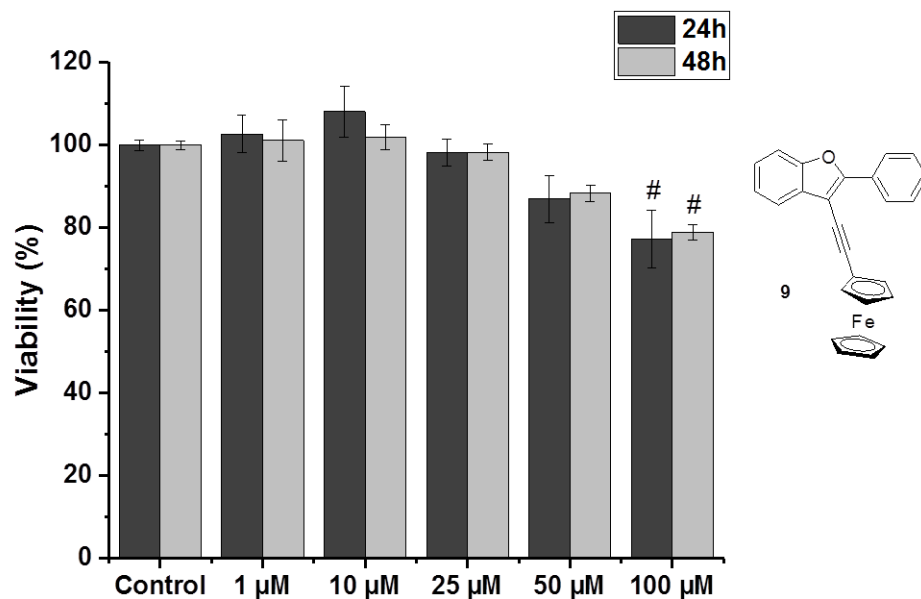

Figure S26. The effects of compound **9** on the viability of MCF7 cells, evaluated by MTT assay. Cells were treated with 1  $\mu$ M, 10  $\mu$ M, 25  $\mu$ M, 50  $\mu$ M and 100  $\mu$ M for 24 h or 48h. Data are shown as mean  $\pm$  SEM of at least three separate experiments. # :  $p < 0.05$  compared with the cells treated with the 10  $\mu$ M solution

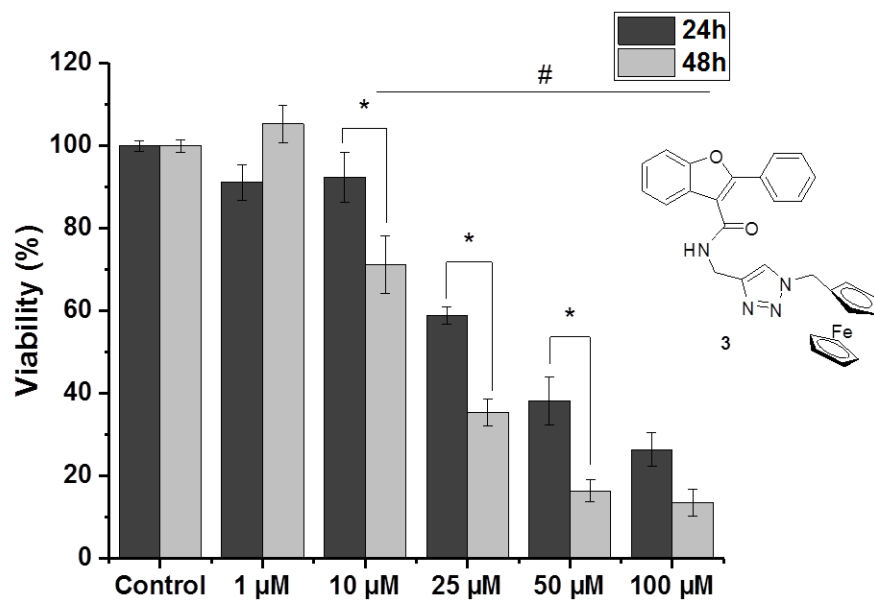

Figure S27. The effects of compound **3** on the viability of MDA-MB-231 cells, evaluated by MTT assay. Cells were treated with 1  $\mu$ M, 10  $\mu$ M, 25  $\mu$ M, 50  $\mu$ M and 100  $\mu$ M for 24 h or 48h. Data are shown as mean  $\pm$  SEM of at least three separate experiments. \*  $p < 0.05$  compared with the untreated cells. # :  $p < 0.05$  compared with the cells treated with the 10  $\mu$ M solution

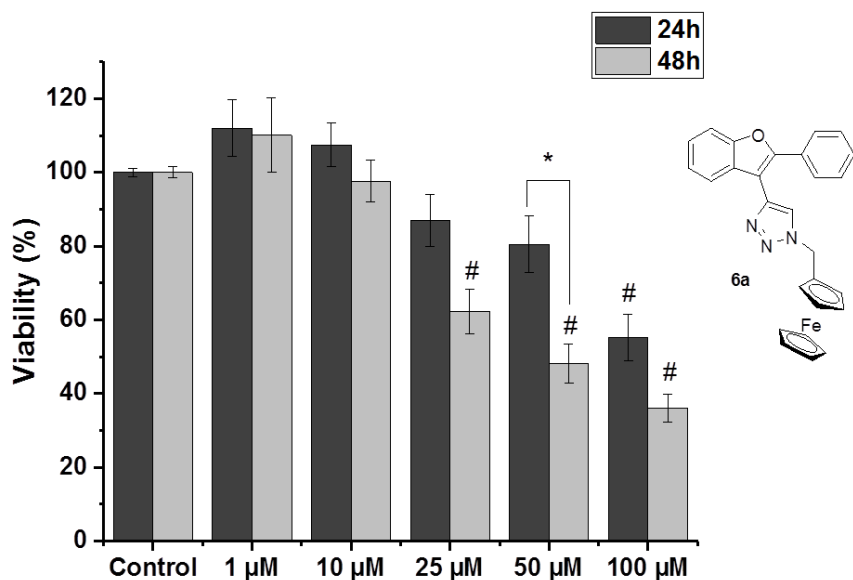

Figure S28. The effects of compound **6a** on the viability of MDA-MB-231 cells, evaluated by MTT assay. Cells were treated with 1  $\mu$ M, 10  $\mu$ M, 25  $\mu$ M, 50  $\mu$ M and 100  $\mu$ M for 24 h or 48h. Data are shown as mean  $\pm$  SEM of at least three separate experiments. \*  $p < 0.05$  compared with the untreated cells. # :  $p < 0.05$  compared with the cells treated with the 10  $\mu$ M solution

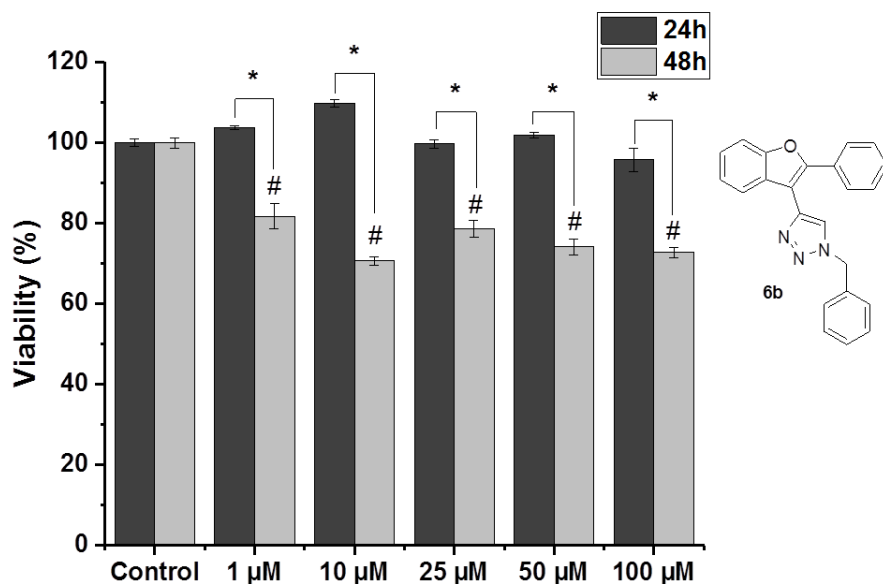

Figure S29. The effects of compound **6b** on the viability of MDA-MB-231 cells, evaluated by MTT assay. Cells were treated with 1  $\mu$ M, 10  $\mu$ M, 25  $\mu$ M, 50  $\mu$ M and 100  $\mu$ M for 24 h or 48h. Data are shown as mean  $\pm$  SEM of at least three separate experiments. \*  $p < 0.05$  compared with the untreated cells. # :  $p < 0.05$  compared with the cells treated with the 10  $\mu$ M solution



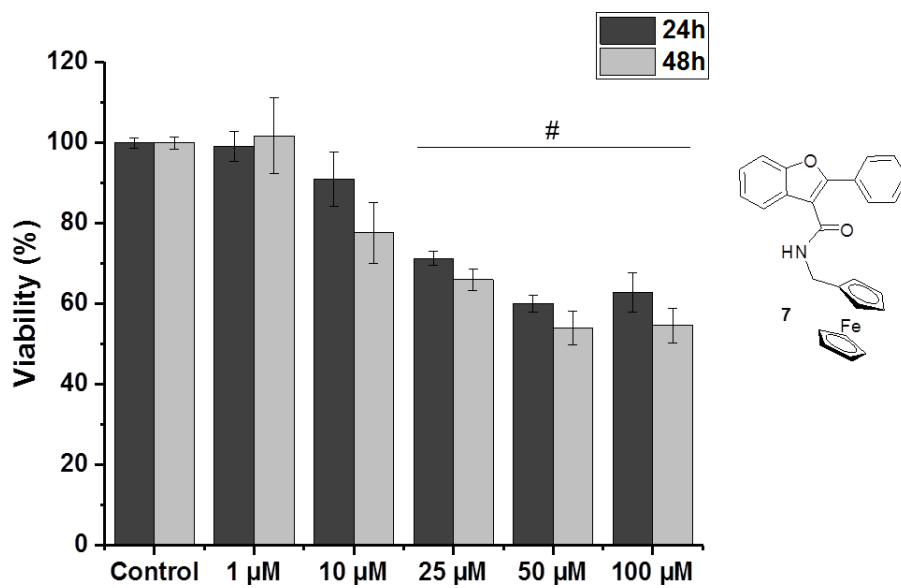

Figure S30. The effects of compound **7** on the viability of MDA-MB-231 cells, evaluated by MTT assay. Cells were treated with 1  $\mu$ M, 10  $\mu$ M, 25  $\mu$ M, 50  $\mu$ M and 100  $\mu$ M for 24 h or 48h. Data are shown as mean  $\pm$  SEM of at least three separate experiments. # :  $p < 0.05$  compared with the cells treated with the 10  $\mu$ M solution

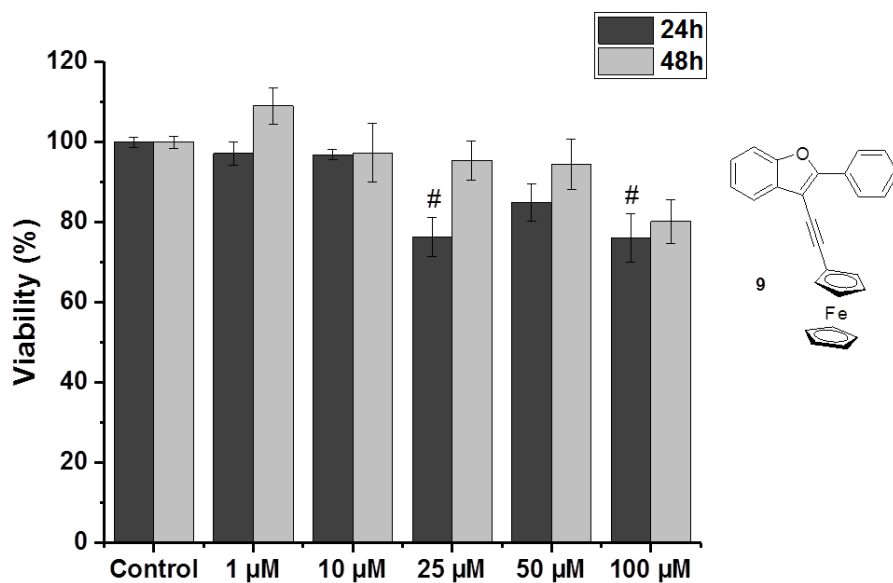

Figure S31. The effects of compound **9** on the viability of MDA-MB-231 cells, evaluated by MTT assay. Cells were treated with 1  $\mu$ M, 10  $\mu$ M, 25  $\mu$ M, 50  $\mu$ M and 100  $\mu$ M for 24 h or 48h. Data are shown as mean  $\pm$  SEM of at least three separate experiments. # :  $p < 0.05$  compared with the cells treated with the 10  $\mu$ M solution

## Crystallography

Table S1. Crystallographic data of compound **9**

| Crystal data                                                          |                                            |
|-----------------------------------------------------------------------|--------------------------------------------|
| Chemical formula                                                      | C <sub>26</sub> H <sub>18</sub> FeO        |
| $M_r$                                                                 | 402.25                                     |
| Crystal system, space group                                           | Monoclinic, $P2_1/c$                       |
| Temperature (K)                                                       | 295                                        |
| $a, b, c$ (Å)                                                         | 7.7793(2), 10.3553(2), 23.3552(6)          |
| $b$ (°)                                                               | 90.692 (2)                                 |
| $V$ (Å <sup>3</sup> )                                                 | 1881.29 (8)                                |
| $Z$                                                                   | 4                                          |
| Radiation type                                                        | Mo $K\alpha$                               |
| $\mu$ (mm <sup>-1</sup> )                                             | 0.82                                       |
| Crystal size (mm)                                                     | 0.39 × 0.29 × 0.07                         |
| Data collection                                                       |                                            |
| Diffractometer                                                        | Oxford Diffraction Xcalibur Gemini Ultra R |
| Absorption correction                                                 | Analytical                                 |
| $T_{\min}, T_{\max}$                                                  | 0.794, 0.945                               |
| No. of measured, independent and observed [ $I > 2s(I)$ ] reflections | 26238, 4138, 3240                          |
| $R_{\text{int}}$                                                      | 0.035                                      |
| $(\sin \theta/\lambda)_{\max}$ (Å <sup>-1</sup> )                     | 0.641                                      |
| Refinement                                                            |                                            |
| $R[F^2 > 2s(F^2)], wR(F^2), S$                                        | 0.037, 0.103, 1.03                         |
| No. of reflections                                                    | 4138                                       |
| No. of parameters                                                     | 298                                        |
| H-atom treatment                                                      | mixed                                      |
| $\Delta\rho_{\max}, \Delta\rho_{\min}$ (e·Å <sup>-3</sup> )           | 0.29, -0.18                                |
